# Supplementary material for: Comparative Genome Analysis of an Extensively Drug-Resistant Isolate of Avian Sequence Type 167 Escherichia coli Strain Sanji with Novel In Silico Serotype O89b:H9
Source: PubMed Central journal article supplement (PMC6392093; doi:10.1128/msystems.00242-18), 2019-02-26

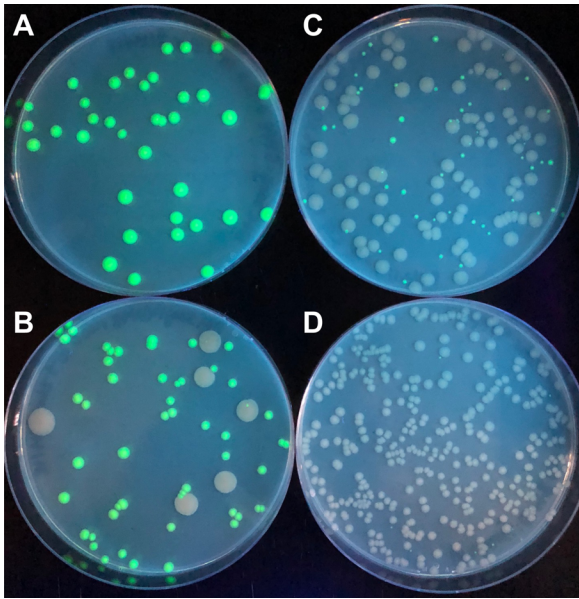

Supplement: mSystems.00242-18-sf003.pdf [file mSystems.00242-18-sf003.pdf]
