# Supplementary material for: Comparative Genome Analysis of an Extensively Drug-Resistant Isolate of Avian Sequence Type 167 Escherichia coli Strain Sanji with Novel In Silico Serotype O89b:H9
Source: PubMed Central journal article supplement (PMC6392093; doi:10.1128/msystems.00242-18), 2019-02-26
Supplement: mSystems.00242-18-st001.pdf [file mSystems.00242-18-st001.pdf]

**Table S1.** In silico MLST analysis and serotyping of *E. coli* Sanji genome and related *E. coli* genomes.

| <i>E. coli</i> Strain | Accession No. | 7-gene MLST | <i>fliC</i> | <i>wzm</i> (a) | <i>wzt</i> (a) | <i>wzm</i> (b) | <i>wzt</i> (b) | Homology (c)    |
|-----------------------|---------------|-------------|-------------|----------------|----------------|----------------|----------------|-----------------|
| Sanji                 | CP011061.1    | ST167       | H9          | O89b           | O89b           |                |                | 17499/17499     |
| CRE1493               | CP019071.1    | ST167       | H9          | O89b           | O89b           |                | O8             | 17499/17499     |
| AR_0149               | CP021532.1    | ST167       | H9          | O89b           | O89b           |                |                | 17499/17499     |
| AR_0150               | CP021736.1    | ST167       | H9          | O89b           | O89b           |                |                | 17499/17499     |
| AR_0151               | CP021691.1    | ST167       | H9          | O89b           | O89b           |                |                | 17499/17499     |
| FDAARGOS_434          | CP023870.1    | ST167       | H9          | O89b           | O89b           |                | O8             | 14833/17499 (d) |
| SCEC020007            | CP025627.1    | ST167       | H9          | O89b           | O89b           |                | O8             | 11852/17499 (d) |
| ECONIH6               | CP026199.1    | ST167       | H9          | O89b           | O89b           |                | O8             | 17499/17499     |
| WCHEC005237           | CP026580.2    | ST167       | H9          | O89b           | O89b           |                |                | 17496/17499     |
| AR_0011               | CP024855.1    | ST167       | H9          | O89b           | O89b           | O9             | O9             | 17499/18275 (e) |
| AR_0014               | CP024859.1    | ST167       | H9          | O89b           | O89b           | O9             | O9             | 17499/17499     |
| 51008369SK1           | CP029973.1    | ST167       | H9          | O89b           | O89b           |                | O8             | 17499/17499     |
| AR435                 | CP029115.1    | ST167       | H9          | O89b           | O89b           |                |                | 17499/17499     |
| M217                  | AP019189.1    | ST167       | H9          | O89b           | O89b           |                |                | 17499/17499     |
| CREC-532              | CP024830.1    | ST167       | H10         | O89b           | O89b           |                |                | 17499/17499     |
| CREC-629              | CP024815.1    | ST167       | H10         | O89b           | O89b           |                |                | 17499/17499     |
| Y5                    | CP013483.1    | ST167       | H4          | O89b           | O89b           |                |                | 17499/17499     |
| AR_0162               | CP021683.1    | ST167       | H5          | O89b           | O89b           |                |                | 17499/17499     |
|                       |               |             |             |                |                |                |                |                 |
| AR_0114               | CP021732.1    | ST617       | H9          | O89b           | O89b           |                |                | 17497/17498     |
| MRSN346355            | CP018121.1    | ST617       | H9          | O89b           | O89b           |                |                | 17499/18274 (e) |
| MRSN346638            | CP018115.1    | ST617       | H9          | O89b           | O89b           |                |                | 17499/18274 (e) |
| MRSN346595            | CP018109.1    | ST617       | H9          | O89b           | O89b           |                |                | 17499/18274 (e) |
| MRSN352231            | CP018103.1    | ST617       | H9          | O89b           | O89b           |                |                | 17499/18274 (e) |
| 5CRE51                | CP021175.1    | ST617       | H10         | O89b           | O89b           |                |                | 17498/17499     |
| SCEC020023            | CP025950.3    | ST617       | H10         | O89b           | O89b           |                |                | 17497/17499     |
| WCHEC005784           | CP028578.2    | ST617       | H10         | O89b           | O89b           |                | O9             | 17499/18564 (e) |
| 675SK2                | CP027701.1    | ST617       | H10         | O89b           | O89b           |                |                | 17494/17497     |
| H8                    | CP010172.1    | ST617       | H4          | O89b           | O89b           |                |                | 17497/17499     |
|                       |               |             |             |                |                |                |                |                 |
| 1283                  | CP023371.1    | ST10        | H10         | O89b           | O89b           |                |                | 17497/17499     |
| Ecol_422              | CP018962.1    | ST10        | H10         | O89b           | O89b           |                |                | 17497/17499     |
| DA33133               | CP029574.1    | ST10        | H10         | O89b           | O89b           |                |                | 17497/17499     |
| 6409                  | CP010371.1    | ST10        | H9          | O89b           | O89b           | O9             | O9             | 17497/17499 (f) |
| 26561                 | CP027118.1    | ST10        | H9          | O89b           | O89b           |                |                | 17496/17497     |
|                       |               |             |             |                |                |                |                |                 |
| 1223                  | CP023383.1    | ST744       | H9          | O89b           | O89b           |                |                | 17495/17497     |
| EC590                 | CP016182.2    | ST744       | H10         | O89b           | O89b           |                |                | 17493/17497     |
| W5-6                  | CP032992.1    | ST744       | H10         | O89b           | O89b           |                |                | 17462/17512     |
| Ecol_AZ155            | CP019005.1    | ST44        | H4          | O89b           | O89b           |                |                | 11180/18274 (e) |
| CH611_eco             | CP017980.1    | ST4981      | H9          | O89b           | O89b           |                |                | 17497/18273 (e) |
| AR_0137               | CP021879.1    | ST1284      | H21         | O89b           | O89b           |                |                | 17497/17499     |

(a) O89b is most closely related to serotype O89 based *wzm* and *wzt* genes (93-94% sequence identity). (b) The *wzm* and *wzt* -containing gene cluster for O9 is located outside the O89b gene cluster, and O8 is a truncated *wzt* gene. (c) Homology: sequence identity/match length (bp). (d) Internal deletion compared to Sanji. (e) Internal insertion compared to Sanji. (f) Partial inversion compared to Sanji.
