# Supplementary material for: Comparative Genome Analysis of an Extensively Drug-Resistant Isolate of Avian Sequence Type 167 Escherichia coli Strain Sanji with Novel In Silico Serotype O89b:H9
Source: PubMed Central journal article supplement (PMC6392093; doi:10.1128/msystems.00242-18), 2019-02-26
Supplement: mSystems.00242-18-st002.pdf [file mSystems.00242-18-st002.pdf]

**Table S2.** *E. coli* genomes carrying the 69.2-kb insertion.

| <i>E. coli</i> strain           | Sanji                    | CRE1540                                       | MRY15-117                          | H8            | 14EC017                       | WCHec4533               | HB-Coli0     |
|---------------------------------|--------------------------|-----------------------------------------------|------------------------------------|---------------|-------------------------------|-------------------------|--------------|
| Number of plasmids              | 6                        | 4                                             | 2                                  | 3             | 3                             | 4                       | 3            |
| Total Resistance Genes          | 32                       | 36 (54) <sup>a</sup>                          | 12                                 | 16            | 22 (24)                       | 21                      | 16           |
| Chromosomal Res. Genes          | 6                        | 18 (19)                                       | 6                                  | 6             | 6                             | 6                       | 6            |
| Plasmid Res. Genes <sup>b</sup> | pSJ_255, 27<br>pSJ_82, 1 | p1540-1, 2<br>p1540-2, 19 (23)<br>p1540-3, 12 | pMRY15-117_1, 7<br>pMRY15-117_2, 1 | plasmid B, 10 | p14EC017a, 1<br>p14EC017b, 17 | pCTXM15, 13<br>pNDM4, 2 | unnamed1, 10 |

<sup>a</sup> Number indicates total non-redundant antibiotic resistance genes, number in parentheses indicate total count including replicates.

<sup>b</sup> Number following the plasmid names indicates the number of non-redundant antibiotic resistance genes on that plasmid.
