# Supplementary material for: Comparative Genome Analysis of an Extensively Drug-Resistant Isolate of Avian Sequence Type 167 Escherichia coli Strain Sanji with Novel In Silico Serotype O89b:H9
Source: mSystems. 2019 Feb 26;4(1):e00242-18. doi: 10.1128/mSystems.00242-18 (PMC6392093; doi:10.1128/mSystems.00242-18)
Supplement: TABLE S3 [file mSystems.00242-18-st003.pdf]

**Table S3.** Antibiotic resistance gene profile of pSJ\_255-related IncHI2 plasmids.

| <i>Bacteria strain</i>      | <i>Serratia marcescens</i> | <i>Salmonella enterica Heidelberg</i> | <i>Escherichia coli APEC O1</i> | <i>Escherichia coli EC5207</i> | <i>Escherichia coli WCHEC050613</i> | <i>Escherichia coli SHP45</i> | <i>Escherichia coli XG-E1</i> | <i>Salmonella enterica Typhimurium GDS147</i> | <i>Escherichia coli WCHEC025943</i> | <i>Escherichia coli HS13-1</i> | <i>Escherichia coli Sanji</i> |
|-----------------------------|----------------------------|---------------------------------------|---------------------------------|--------------------------------|-------------------------------------|-------------------------------|-------------------------------|-----------------------------------------------|-------------------------------------|--------------------------------|-------------------------------|
| <i>IncHI2 plamid</i>        | R478                       | pSH111_227                            | pAPEC-O1-R                      | pEC5207                        | pMCR                                | pHNSHP45-2                    | pXGE1mcr                      | pHXY0908                                      | pMCR1_025943                        | pHS13-1                        | pSJ_255                       |
| <i>No. resistance genes</i> | 6                          | 8                                     | 6                               | 4                              | 23                                  | 25                            | 25                            | 27                                            | 27                                  | 30                             | 27                            |
| aac(3)-Iva                  |                            |                                       |                                 |                                | ✓                                   | ✓                             | ✓                             | ✓                                             | ✓                                   |                                | ✓                             |
| aac(3)-Via                  |                            |                                       | ✓                               |                                |                                     |                               |                               |                                               |                                     |                                |                               |
| aac(3)*                     |                            |                                       |                                 |                                | ✓                                   | ✓                             | ✓                             | ✓                                             | ✓                                   |                                | ✓                             |
| aac(6')Ib-cr                |                            |                                       |                                 |                                |                                     |                               |                               | ✓                                             |                                     | ✓                              | ✓                             |
| aacA7                       |                            |                                       |                                 | ✓                              |                                     |                               |                               |                                               |                                     |                                |                               |
| aadA1                       |                            |                                       | ✓                               |                                | ✓                                   | ✓                             | ✓                             | ✓                                             | ✓                                   | ✓                              | ✓                             |
| aadA2                       |                            |                                       |                                 |                                | ✓                                   | ✓                             | ✓                             | ✓                                             |                                     | ✓                              | ✓                             |
| aph(3')-Ia                  |                            |                                       |                                 |                                |                                     | ✓                             | ✓                             | ✓                                             | ✓                                   | ✓                              | ✓                             |
| aph(3')-Ic                  | ✓                          |                                       |                                 |                                |                                     |                               |                               |                                               |                                     |                                |                               |
| aph(3')-IIa                 |                            | ✓                                     |                                 |                                |                                     |                               |                               |                                               |                                     |                                |                               |
| aph(4)-Ia                   |                            |                                       |                                 |                                |                                     | ✓                             | ✓                             | ✓                                             | ✓                                   |                                | ✓                             |
| aph(6)-Ic                   |                            | ✓                                     |                                 |                                |                                     |                               |                               |                                               |                                     |                                |                               |
| arr-3                       |                            |                                       |                                 |                                |                                     |                               |                               | ✓                                             |                                     | ✓                              | ✓                             |
| blaCMY-2                    |                            |                                       |                                 | ✓                              |                                     |                               |                               |                                               |                                     |                                |                               |
| blaCTX-M-14                 |                            |                                       |                                 |                                | ✓                                   | ✓                             | ✓                             |                                               |                                     |                                |                               |
| blaCTX-M-65                 |                            |                                       |                                 |                                |                                     |                               |                               |                                               | ✓                                   |                                |                               |
| blaOXA-1                    |                            |                                       |                                 |                                |                                     |                               |                               | ✓                                             |                                     | ✓                              | ✓                             |
| blaTEM-1B                   |                            |                                       |                                 |                                |                                     |                               |                               |                                               | ✓                                   |                                |                               |
| ble                         |                            |                                       |                                 |                                | ✓                                   | ✓                             | ✓                             | ✓                                             | ✓                                   | ✓                              |                               |
| catA1                       | ✓                          |                                       |                                 |                                |                                     |                               |                               |                                               |                                     |                                |                               |
| catB3                       |                            |                                       |                                 |                                |                                     |                               |                               | ✓                                             |                                     | ✓                              | ✓                             |
| cmlA1                       |                            |                                       |                                 |                                | ✓                                   | ✓                             | ✓                             | ✓                                             |                                     | ✓                              | ✓                             |
| dfrA12                      |                            |                                       |                                 |                                | ✓                                   | ✓                             | ✓                             | ✓                                             |                                     | ✓                              |                               |
| eamA                        |                            |                                       |                                 |                                |                                     |                               |                               |                                               | ✓                                   | ✓                              |                               |
| estX                        |                            |                                       |                                 |                                |                                     | ✓                             | ✓                             | ✓                                             |                                     |                                | ✓                             |
| flrR                        |                            |                                       |                                 |                                |                                     | ✓                             | ✓                             | ✓                                             | ✓                                   | ✓                              | ✓                             |
| fosA                        |                            |                                       |                                 |                                | ✓                                   | ✓                             | ✓                             | ✓                                             |                                     |                                |                               |
| glmM                        |                            |                                       |                                 |                                | ✓                                   | ✓                             | ✓                             | ✓                                             |                                     |                                | ✓                             |
| lnu(F)                      |                            |                                       |                                 |                                |                                     |                               |                               |                                               | ✓                                   |                                |                               |
| mcr-1                       |                            |                                       |                                 |                                | ✓                                   | ✓                             | ✓                             |                                               | ✓                                   |                                |                               |
| mef(B)                      |                            |                                       |                                 |                                |                                     |                               |                               |                                               | ✓                                   | ✓                              |                               |
| mph(A)                      |                            |                                       |                                 |                                | ✓                                   |                               | ✓                             |                                               | ✓                                   | ✓                              | ✓                             |
| mphR                        |                            |                                       |                                 |                                | ✓                                   |                               | ✓                             |                                               | ✓                                   | ✓                              | ✓                             |
| mrx                         |                            |                                       |                                 |                                | ✓                                   |                               | ✓                             |                                               | ✓                                   | ✓                              | ✓                             |
| nimC/nimA                   |                            |                                       |                                 |                                | ✓                                   | ✓                             | ✓                             | ✓                                             | ✓                                   | ✓                              | ✓                             |
| oqxA                        |                            |                                       |                                 |                                | ✓                                   | ✓                             |                               | ✓                                             | ✓                                   | ✓                              | ✓                             |
| oqxB                        |                            |                                       |                                 |                                | ✓                                   | ✓                             |                               | ✓                                             | ✓                                   | ✓                              | ✓                             |
| oqxR                        |                            |                                       |                                 |                                | ✓                                   | ✓                             |                               | ✓                                             | ✓                                   | ✓                              | ✓                             |
| psp                         |                            |                                       |                                 |                                |                                     |                               | ✓                             |                                               |                                     |                                | ✓                             |
| qacE                        |                            |                                       |                                 |                                | ✓                                   | ✓                             | ✓                             | ✓                                             | ✓                                   | ✓                              | ✓                             |
| qacEd1                      |                            |                                       | ✓                               | ✓                              |                                     |                               |                               | ✓                                             |                                     | ✓                              | ✓                             |
| qacI                        |                            |                                       |                                 |                                | ✓                                   | ✓                             | ✓                             | ✓                                             |                                     | ✓                              | ✓                             |
| qnrS2                       |                            |                                       |                                 |                                |                                     |                               |                               |                                               |                                     |                                |                               |
| strA                        |                            | ✓                                     |                                 |                                |                                     |                               |                               |                                               | ✓                                   |                                |                               |
| strB                        |                            | ✓                                     |                                 |                                |                                     |                               |                               |                                               | ✓                                   |                                |                               |
| sul1                        |                            |                                       | ✓                               | ✓                              | ✓                                   | ✓                             | ✓                             | ✓                                             | ✓                                   | ✓                              | ✓                             |
| sul2                        |                            |                                       |                                 |                                | ✓                                   | ✓                             | ✓                             | ✓                                             | ✓                                   |                                | ✓                             |
| sul3                        |                            |                                       |                                 |                                | ✓                                   | ✓                             | ✓                             | ✓                                             | ✓                                   | ✓                              | ✓                             |
| tet(A)                      |                            |                                       |                                 |                                |                                     |                               |                               |                                               | ✓                                   | ✓                              |                               |
| tet(B)                      | ✓                          | ✓                                     |                                 |                                |                                     |                               |                               |                                               |                                     |                                |                               |
| tet(C)                      |                            |                                       | ✓                               |                                |                                     |                               |                               |                                               |                                     |                                |                               |
| tet(M)                      |                            |                                       |                                 |                                |                                     |                               |                               |                                               | ✓                                   |                                | ✓                             |
| tetC                        | ✓                          | ✓                                     |                                 |                                |                                     |                               |                               |                                               |                                     | ✓                              |                               |
| tetD                        | ✓                          | ✓                                     |                                 |                                |                                     |                               |                               |                                               |                                     |                                |                               |
| tetR                        |                            |                                       |                                 |                                |                                     |                               |                               |                                               | ✓                                   | ✓                              |                               |
| tetR(B)                     | ✓                          | ✓                                     |                                 |                                |                                     |                               |                               |                                               |                                     |                                |                               |
| tetR(C)                     |                            |                                       | ✓                               |                                |                                     |                               |                               |                                               |                                     |                                |                               |
